# Supplementary material for: Structured Inquiry-Based Learning: Drosophila GAL4 Enhancer Trap Characterization in an Undergraduate Laboratory Course
Source: PLoS Biol. 2014 Dec 30;12(12):e1002030. doi: 10.1371/journal.pbio.1002030 (PMC4280103; doi:10.1371/journal.pbio.1002030)
Supplement: S2 Table — Estimated course budget. (XLSX) [file pbio.1002030.s002.xlsx]

## Sheet: Sheet1
Estimates are for five sections of 20 students each, working in groups of two, at listed prices current as of October 2014.
Institutional discounts and economies of scale would reduce your actual cost per student.
Not included: Standard 1000 ul, 200 ul, and 10 ul pipet tips
Fruit Fly Husbandry
Item	Quantity	Vendor	Catalog	Price	Total
Formula 4-24, plain, 4 L	1	Carolina Biological Supply	173204	20.6	20.6
Narrow polystyrene vials, (5 X 100)	1	Flystuff/Genesee	32-109	90.2	90.2
Cotton balls, large (1000)	1	Flystuff/Genesee	51-101	58.15	58.15
Total					168.95
Note: standard cornmeal-molasses food is preferable if facilities exist for on-site preparation.
Inverse PCR
Item	Quantity	Vendor	Catalog	Price	Total
DNeasy Blood and Tissue Kit, 50	1	QIAGEN	69504	158	158
HpaII, 2000 units	1	New England Biolabs	R0171S	60	60
T4 DNA ligase, 500 units	1	Invitrogen	15224-025	226	226
Platinum Taq, 120 rxns	2	Invitrogen	10966018	99	198
10 mM dNTP mix, 100 ul	3	Invitrogen	18427013	81	243
salt-free PCR primer oligos	4	Invitrogen	value oligos	5	20
Agarose I, 25 g	1	Amresco/VWR	0710-25G	52.67	52.67
GeneRuler 1 kb, 250	1	Thermo Scientific	SM0311	128	128
QIAQuick PCR Purification Kit, 50	1	QIAGEN	28104	110	110
DNA sequencing (96 well plate)	1	Genomics Core Facility	will vary	374.47	374.47
Total					1570.14
Equipment
water bath	1 per section
Thermocycler	1 per 8 groups
agarose gel electrophoresis rigs	6 lanes per group
Power supplies	1 per 4 gel rigs
computer with internet access	1 per group
Sets of pipettors	1 per group
Dissection and Immunohistochemistry
Item	Quantity	Vendor	Catalog	Price	Total
Dumont #5 student forceps	40	Fine Science Tools	91150-20	24.25	970
Na2HPO4*7H2O, 500g	1	Fisher	AC42438-5000	55.4	55.4
NaH2PO4H2O, 500g	1	Fisher	BP330-500	116.5	116.5
NaCl, 500g	1	Fisher	S671-500	61.9	61.9
37% Paraformaldehyde, 500 ml	1	Fisher	F79-500	79.1	79.1
Glass Pasteur pipets, short tip	1	VWR	14673-010	137.52	137.52
Triton-X 100, 100 ml	1	Sigma	X100-100ML	33.6	33.6
Normal Donkey Serum	1	Sigma	D9663-10ML	27.9	27.9
anti-mCD8, 1.0 ml (333)	1	Invitrogen	MCD0800	132	132
1D4, 1.0 ml supernatant	1	DSHB	1D4	35	35
488 donkey anti-rt, 0.5 ml (500)	1	Invitrogen	A-21208	189	189
555 donkey anti-ms, 0.5 ml (500)	1	Invitrogen	A-31570	189	189
22 mm square cover-slips	1	VWR	48366-067	23.49	23.49
Frosted slides, case of 20	1	VWR	16002-080	357.17	357.17
Poly-L-Lysine, 100 mg	1	Sigma	P1524	138	138
Photo Flo 200 Solution, 16 oz	1	VWR	GRKK146-4510	15	15
Xylene, 500 ml	1	Fisher	X5-500	56	56
DPX, 100 ml	1	Sigma	06522-100ML	26.3	26.3
Total					2642.88
Equipment
Dissection microscopes with light	1 per group
Mini shaker at room temperature	1 per five groups
Rocking shaker at 4 C	1 per eight groups
Laser confocal microscope OR	1 per section
Epifluorescence microscope & camera	1 per section
Sets of pipettors	1 per group
Sets of pipet aids	1 per group
